# Supplementary material for: Reproducible proteomics sample preparation for single FFPE tissue slices using acid-labile surfactant and direct trypsinization
Source: PubMed Central journal article supplement (PMC5838928; doi:10.1186/s12014-018-9188-y), 2018-03-06

**A**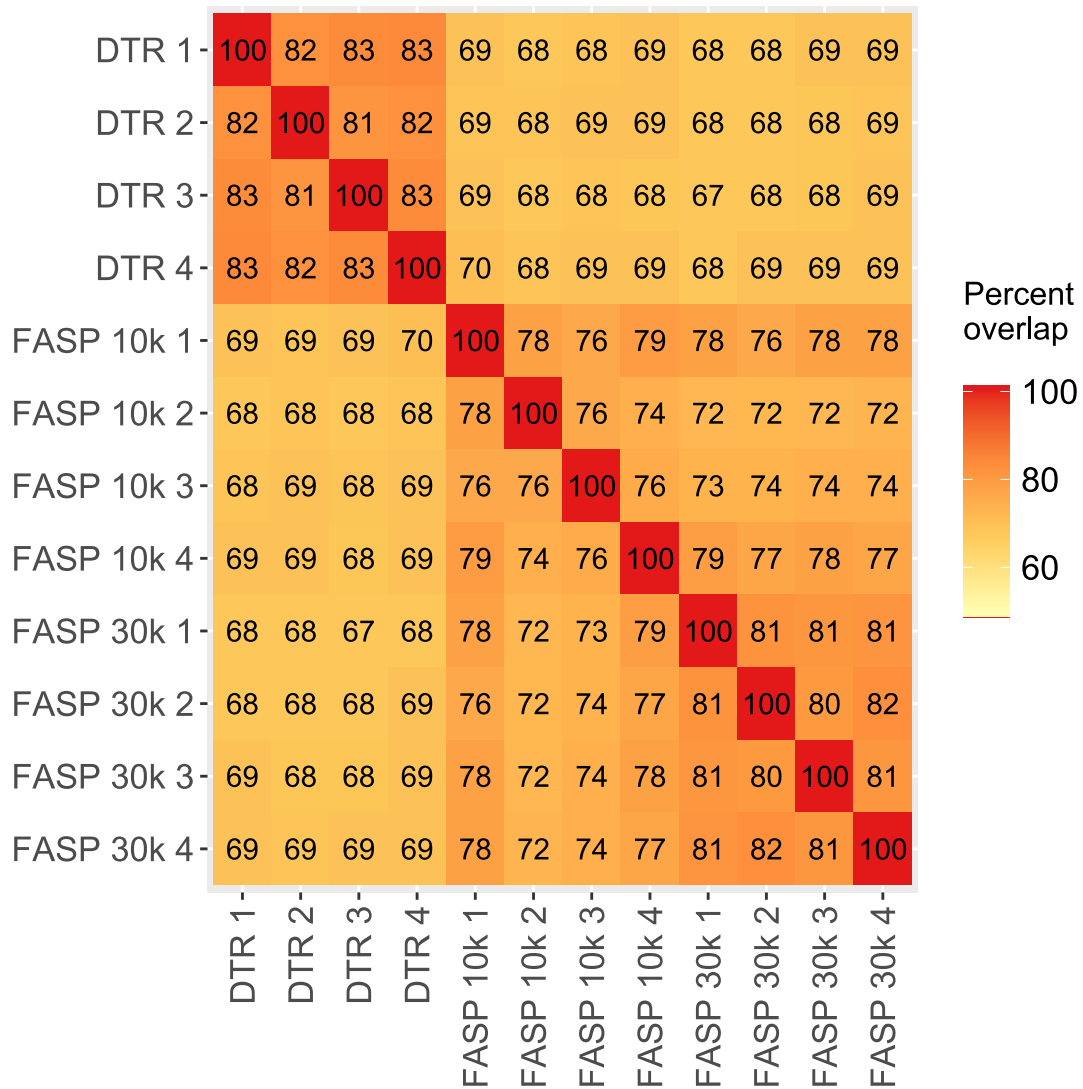**B**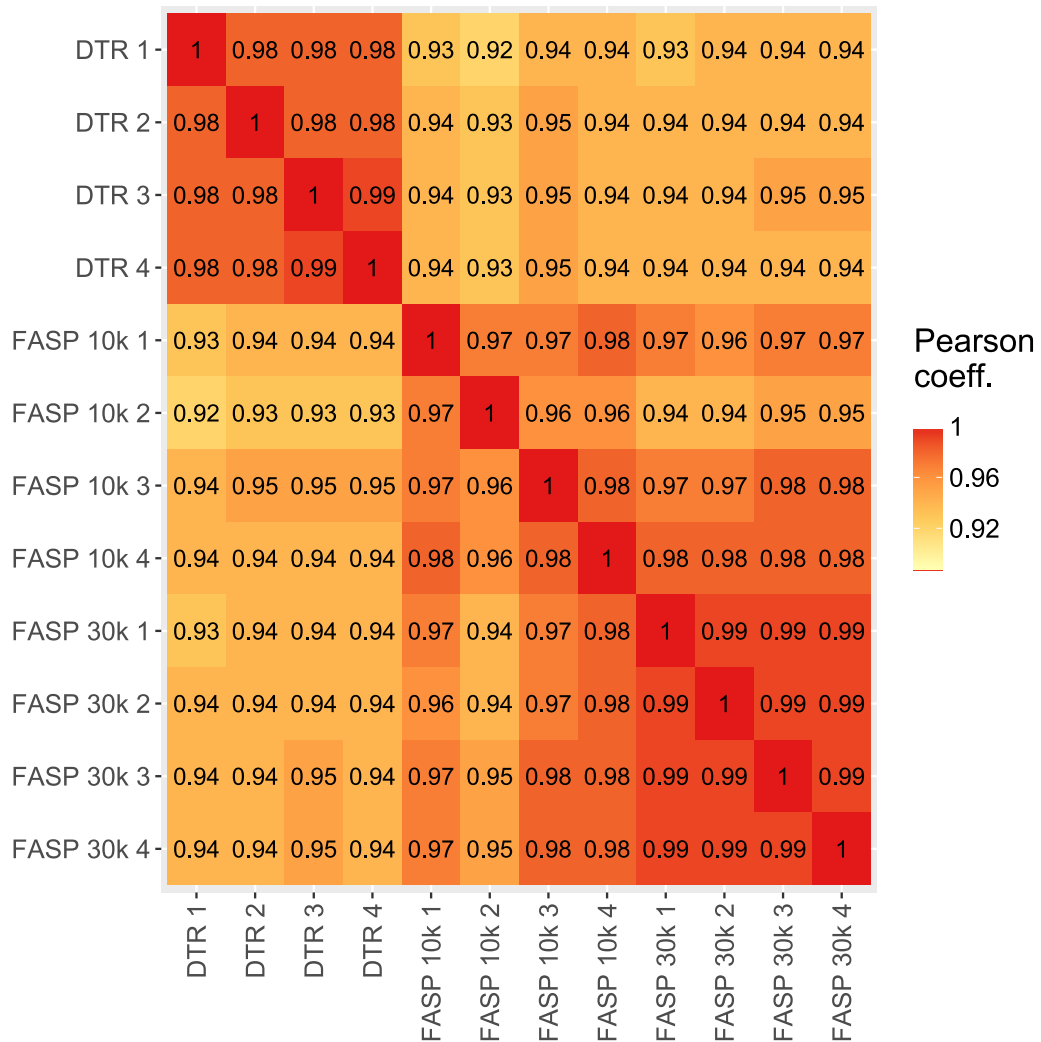

Supplement: 12014_2018_9188_MOESM4_ESM.pdf [file 12014_2018_9188_MOESM4_ESM.pdf]
